# Supplementary material
Source: PubMed Central journal article supplement (PMC2643221)
Supplement: supp_178_10_1033__1.pdf [file supp_178_10_1033__1.pdf]

**MUC5B is the major mucin in the gel-phase of sputum in chronic obstructive pulmonary disease**

Sara Kirkham, Umme Kolsum, Karine Rousseau, Dave Singh, Jørgen Vestbo and David J Thornton

Table E1.

Mucins in sputum of COPD patients and healthy smokers.

| COPD /<br>Healthy smoker<br>(HS) | Age (years) | MUC5AC<br>( $\mu\text{g/g}$ gel) | MUC5B<br>( $\mu\text{g/g}$ gel) | MUC5AC /<br>MUC5B ratio |
|----------------------------------|-------------|----------------------------------|---------------------------------|-------------------------|
| COPD                             | 52          | 7027                             | 834                             | 8.4                     |
| COPD                             | 69          | 4092                             | 749                             | 5.5                     |
| COPD                             | 56          | 5396                             | 2361                            | 2.3                     |
| COPD                             | 63          | 12176                            | 521                             | 23.4                    |
| COPD                             | 63          | 4217                             | 1951                            | 2.2                     |
| COPD                             | 56          | 2732                             | 1482                            | 1.8                     |
| COPD                             | 46          | 441                              | 2470                            | 0.2                     |
| COPD                             | 59          | 1020                             | 2722                            | 0.4                     |
| COPD                             | 43          | 4514                             | 1371                            | 3.3                     |
| COPD                             | 52          | 1498                             | 2196                            | 0.7                     |
| COPD                             | 70          | 2998                             | 1785                            | 1.7                     |
| COPD                             | 62          | 1233                             | 752                             | 1.6                     |
| COPD                             | 53          | 1427                             | 933                             | 1.5                     |
| COPD                             | 65          | 7185                             | 8254                            | 0.9                     |
| COPD                             | 52          | 6568                             | 7734                            | 0.8                     |
| COPD                             | 68          | 3069                             | 376                             | 8.2                     |
| COPD                             | 52          | 2721                             | 620                             | 4.4                     |
| COPD                             | 52          | 7027                             | 834                             | 8.4                     |
| COPD                             | 69          | 4092                             | 749                             | 5.5                     |
| COPD                             | 56          | 5396                             | 2361                            | 2.3                     |
| COPD                             | 63          | 12176                            | 521                             | 23.4                    |
| COPD                             | 63          | 4217                             | 1951                            | 2.2                     |
| COPD                             | 56          | 2732                             | 1482                            | 1.8                     |
| HS                               | 58          | 526                              | 2185                            | 0.2                     |
| HS                               | 77          | 1307                             | 2233                            | 0.6                     |
| HS                               | 64          | 4991                             | 453                             | 11.0                    |

|    |    |       |       |      |
|----|----|-------|-------|------|
| HS | 81 | 9669  | 8463  | 1.1  |
| HS | 79 | 18    | 102   | 0.2  |
| HS | 72 | 260   | 1454  | 0.2  |
| HS | 66 | 1752  | 1934  | 0.9  |
| HS | 76 | 1998  | 6149  | 0.3  |
| HS | 75 | 10466 | 2941  | 3.6  |
| HS | 64 | 1561  | 1275  | 1.2  |
| HS | 67 | 15959 | 2539  | 0.6  |
| HS | 65 | 99    | 2697  | 0.03 |
| HS | 70 | 1469  | 3512  | 0.4  |
| HS | 64 | 988   | 36621 | 0.03 |
| HS | 63 | 1690  | 1894  | 0.9  |
| HS | 58 | 526   | 2185  | 0.2  |
